# Supplementary material for: From resource-rich to resource-poor grasslands: A shift in β-diversity assembly mechanisms from biotic control to abiotic dominance
Source: Research Square preprint supplement (doi:10.21203/rs.3.rs-7763128/v1), 2025-10-16
Supplement: Supplementary file 1 [file 0b0e7f85937b93c3c6f6718b.docx]

[**https://doi.org/10.6084/m9.figshare.30270415**](https://urldefense.com/v3/__https:/doi.org/10.6084/m9.figshare.30270415__;!!NLFGqXoFfo8MMQ!ueNV_d5B4Bc8rFrRzL7ieYEbqYAoDZYW3hfxWijYfdqX0EZcCDtYUmZi-ERWqlNo0N5ZIyemoISPNZgOVPkH$)
